# Supplementary material for: Longitudinal Internal Validity of the Quality of Life after Brain Injury: Response Shift and Responsiveness
Source: MDPI journal article supplement (doi:10.3390/jcm12093197), 2023-04-29
Supplement: s1 [file s1]

**The CENTER-TBI participants and investigators:**

Cecilia Åkerlund<sup>1</sup>, Krisztina Amrein<sup>2</sup>, Nada Andelic<sup>3</sup>, Lasse Andreassen<sup>4</sup>, Audny Anke<sup>5</sup>, Anna Antoni<sup>6</sup>, Gérard Audibert<sup>7</sup>, Philippe Azouvi<sup>8</sup>, Maria Luisa Azzolini<sup>9</sup>, Ronald Bartels<sup>10</sup>, Pál Barzó<sup>11</sup>, Romuald Beauvais<sup>12</sup>, Ronny Beer<sup>13</sup>, Bo-Michael Bellander<sup>14</sup>, Antonio Belli<sup>15</sup>, Habib Benali<sup>16</sup>, Maurizio Berardino<sup>17</sup>, Luigi Beretta<sup>9</sup>, Morten Blaabjerg<sup>18</sup>, Peter Bragge<sup>19</sup>, Alexandra Brazinova<sup>20</sup>, Vibeke Brinck<sup>21</sup>, Joanne Brooker<sup>22</sup>, Camilla Brorsson<sup>23</sup>, Andras Buki<sup>24</sup>, Monika Bullinger<sup>25</sup>, Manuel Cabeleira<sup>26</sup>, Alessio Caccioppola<sup>27</sup>, Emiliana Calappi<sup>27</sup>, Maria Rosa Calvi<sup>9</sup>, Peter Cameron<sup>28</sup>, Guillermo Carbayo Lozano<sup>29</sup>, Marco Carbonara<sup>27</sup>, Simona Cavallo<sup>17</sup>, Giorgio Chevallard<sup>30</sup>, Arturo Chierogato<sup>30</sup>, Giuseppe Citerio<sup>31, 32</sup>, Hans Clusmann<sup>33</sup>, Mark Coburn<sup>34</sup>, Jonathan Coles<sup>35</sup>, Jamie D. Cooper<sup>36</sup>, Marta Correia<sup>37</sup>, Amra Čović<sup>38</sup>, Nicola Curry<sup>39</sup>, Endre Czeiter<sup>24</sup>, Marek Czosnyka<sup>26</sup>, Claire Dahyot-Fizelier<sup>40</sup>, Paul Dark<sup>41</sup>, Helen Dawes<sup>42</sup>, Véronique De Keyser<sup>43</sup>, Vincent Degos<sup>16</sup>, Francesco Della Corte<sup>44</sup>, Hugo den Boogert<sup>10</sup>, Bart Depreitere<sup>45</sup>, Đula Đilvesi<sup>46</sup>, Abhishek Dixit<sup>47</sup>, Emma Donoghue<sup>22</sup>, Jens Dreier<sup>48</sup>, Guy-Loup Dulière<sup>49</sup>, Ari Ercole<sup>47</sup>, Patrick Esser<sup>42</sup>, Erzsébet Ezer<sup>50</sup>, Martin Fabricius<sup>51</sup>, Valery L. Feigin<sup>52</sup>, Kelly Foks<sup>53</sup>, Shirin Frisvold<sup>54</sup>, Alex Furmanov<sup>55</sup>, Pablo Gagliardo<sup>56</sup>, Damien Galanaud<sup>16</sup>, Dashiell Gantner<sup>28</sup>, Guoyi Gao<sup>57</sup>, Pradeep George<sup>58</sup>, Alexandre Ghuysen<sup>59</sup>, Lelde Giga<sup>60</sup>, Ben Glocker<sup>61</sup>, Jagoš Golubovic<sup>46</sup>, Pedro A. Gomez<sup>62</sup>, Johannes Gratz<sup>63</sup>, Benjamin Gravesteijn<sup>64</sup>, Francesca Grossi<sup>44</sup>, Russell L. Gruen<sup>65</sup>, Deepak Gupta<sup>66</sup>, Juanita A. Haagsma<sup>64</sup>, Iain Haitsma<sup>67</sup>, Raimund Helbok<sup>13</sup>, Eirik Helseth<sup>68</sup>, Lindsay Horton<sup>69</sup>, Jilske Huijben<sup>64</sup>, Peter J. Hutchinson<sup>70</sup>, Bram Jacobs<sup>71</sup>, Stefan Jankowski<sup>72</sup>, Mike Jarrett<sup>21</sup>, Ji-yao Jiang<sup>58</sup>, Faye Johnson<sup>73</sup>, Kelly Jones<sup>52</sup>, Mladen Karan<sup>46</sup>, Angelos G. Kolias<sup>70</sup>, Erwin Kompanje<sup>74</sup>, Daniel Kondziella<sup>51</sup>, Evgenios Kornaropoulos<sup>47</sup>, Lars-Owe Koskinen<sup>75</sup>, Noémi Kovács<sup>76</sup>, Ana Kowark<sup>77</sup>, Alfonso Lagares<sup>62</sup>, Linda Lanyon<sup>58</sup>, Steven Laureys<sup>78</sup>, Fiona Lecky<sup>79, 80</sup>, Didier Ledoux<sup>78</sup>, Rolf Lefering<sup>81</sup>, Valerie Legrand<sup>82</sup>, Aurelie Lejeune<sup>83</sup>, Leon Levi<sup>84</sup>, Roger Lightfoot<sup>85</sup>, Hester Lingsma<sup>64</sup>, Andrew I.R. Maas<sup>43</sup>, Ana M. Castaño-León<sup>62</sup>, Marc Maegele<sup>86</sup>, Marek Majdan<sup>20</sup>, Alex Manara<sup>87</sup>, Geoffrey Manley<sup>88</sup>, Costanza Martino<sup>89</sup>, Hugues Maréchal<sup>49</sup>, Julia Mattern<sup>90</sup>, Catherine McMahon<sup>91</sup>, Béla Meleghe<sup>92</sup>, David Menon<sup>47</sup>, Tomas Menovsky<sup>43</sup>, Ana Mikolic<sup>64</sup>, Benoit Misset<sup>78</sup>, Visakh Muraleedharan<sup>58</sup>, Lynnette Murray<sup>28</sup>, Ancuta Negru<sup>93</sup>, David Nelson<sup>1</sup>, Virginia Newcombe<sup>47</sup>, Daan Nieboer<sup>64</sup>, József Nyirádi<sup>2</sup>, Otesile Olubukola<sup>79</sup>, Matej Oresic<sup>94</sup>, Fabrizio Ortolano<sup>27</sup>, Aarno Palotie<sup>95, 96, 97</sup>, Paul M. Parizel<sup>98</sup>, Jean-François Payen<sup>99</sup>, Natascha Perera<sup>12</sup>, Vincent Perlberg<sup>16</sup>, Paolo Persona<sup>100</sup>, Wilco Peul<sup>101</sup>, Anna Piippo-Karjalainen<sup>102</sup>, Matti Pirinen<sup>95</sup>, Dana Pisica<sup>64</sup>, Horia Ples<sup>93</sup>, Suzanne Polinder<sup>64</sup>, Inigo Pomposo<sup>29</sup>, Jussi P. Posti<sup>103</sup>, Louis Puybasset<sup>104</sup>, Andreea Radoi<sup>105</sup>, Arminas Ragauskas<sup>106</sup>, Rahul Raj<sup>102</sup>, Malinka Rambadagalla<sup>107</sup>, Isabel Retel Helmrich<sup>64</sup>, Jonathan Rhodes<sup>108</sup>, Sylvia Richardson<sup>109</sup>, Sophie Richter<sup>47</sup>, Samuli Ripatti<sup>95</sup>, Saulius Rocka<sup>106</sup>, Cecilie Roe<sup>110</sup>, Olav Roise<sup>111, 112</sup>, Jonathan Rosand<sup>113</sup>, Jeffrey V. Rosenfeld<sup>114</sup>, Christina Rosenlund<sup>115</sup>, Guy Rosenthal<sup>55</sup>, Rolf Rossaint<sup>77</sup>, Sandra Rossi<sup>100</sup>, Daniel Rueckert<sup>61</sup>, Martin Rusnák<sup>116</sup>, Juan Sahuquillo<sup>105</sup>, Oliver Sakowitz<sup>90, 117</sup>, Renan Sanchez-Porras<sup>117</sup>, Janos Sandor<sup>118</sup>, Nadine Schäfer<sup>81</sup>, Silke Schmidt<sup>119</sup>, Herbert Schoechl<sup>120</sup>, Guus Schoonman<sup>121</sup>, Rico Frederik Schou<sup>122</sup>, Elisabeth Schwendenwein<sup>6</sup>, Charlie Sewalt<sup>64</sup>, Ranjit D. Singh<sup>101</sup>, Toril Skandsen<sup>123, 124</sup>, Peter Smielewski<sup>26</sup>, Abayomi Sorinola<sup>125</sup>, Emmanuel Stamatakis<sup>47</sup>, Simon Stanworth<sup>39</sup>, Robert Stevens<sup>126</sup>, William Stewart<sup>127</sup>, Ewout W. Steyerberg<sup>64, 128</sup>, Nino Stocchetti<sup>129</sup>, Nina Sundström<sup>130</sup>, Riikka Takala<sup>131</sup>, Viktória Tamás<sup>125</sup>, Tomas Tamosiutis<sup>132</sup>, Mark Steven Taylor<sup>20</sup>, Braden Te Ao<sup>52</sup>, Olli Tenovuo<sup>103</sup>, Alice Theadom<sup>52</sup>, Matt Thomas<sup>87</sup>, Dick Tibboel<sup>133</sup>, Marjolein Timmers<sup>74</sup>, Christos Tolia<sup>134</sup>, Tony Trapani<sup>28</sup>, Cristina Maria Tudora<sup>93</sup>,

## Supplemental Material

Andreas Unterberg<sup>90</sup>, Peter Vajkoczy<sup>135</sup>, Shirley Vallance<sup>28</sup>, Egils Valeinis<sup>60</sup>, Zoltán Vámos<sup>50</sup>, Mathieu van der Jagt<sup>136</sup>, Gregory Van der Steen<sup>43</sup>, Joukje van der Naalt<sup>71</sup>, Jeroen T.J.M. van Dijck<sup>101</sup>, Inge A. M. van Erp<sup>101</sup>, Thomas A. van Essen<sup>101</sup>, Wim Van Hecke<sup>137</sup>, Caroline van Heugten<sup>138</sup>, Dominique Van Praag<sup>139</sup>, Ernest van Veen<sup>64</sup>, Thijs Vande Vyvere<sup>137</sup>, Roel P. J. van Wijk<sup>101</sup>, Alessia Vargiolu<sup>32</sup>, Emmanuel Vega<sup>83</sup>, Kimberley Velt<sup>64</sup>, Jan Verheyden<sup>137</sup>, Paul M. Vespa<sup>140</sup>, Anne Vik<sup>123, 141</sup>, Rimantas Vilcinis<sup>132</sup>, Victor Volovici<sup>67</sup>, Nicole von Steinbüchel<sup>38</sup>, Daphne Voormolen<sup>64</sup>, Petar Vulekovic<sup>46</sup>, Kevin K.W. Wang<sup>142</sup>, Daniel Whitehouse<sup>47</sup>, Eveline Wiegers<sup>64</sup>, Guy Williams<sup>47</sup>, Lindsay Wilson<sup>69</sup>, Stefan Winzeck<sup>47</sup>, Stefan Wolf<sup>143</sup>, Zhihui Yang<sup>113</sup>, Peter Ylén<sup>144</sup>, Alexander Younsi<sup>90</sup>, Frederick A. Zeiler<sup>47,145</sup>, Veronika Zelinkova<sup>20</sup>, Agate Ziverte<sup>60</sup>, Tommaso Zoerle<sup>27</sup>

## Supplemental Material

- <sup>1</sup> Department of Physiology and Pharmacology, Section of Perioperative Medicine and Intensive Care, Karolinska Institutet, Stockholm, Sweden
- <sup>2</sup> János Szentágothai Research Centre, University of Pécs, Pécs, Hungary
- <sup>3</sup> Division of Clinical Neuroscience, Department of Physical Medicine and Rehabilitation, Oslo University Hospital and University of Oslo, Oslo, Norway
- <sup>4</sup> Department of Neurosurgery, University Hospital Northern Norway, Tromsø, Norway
- <sup>5</sup> Department of Physical Medicine and Rehabilitation, University Hospital Northern Norway, Tromsø, Norway
- <sup>6</sup> Trauma Surgery, Medical University Vienna, Vienna, Austria
- <sup>7</sup> Department of Anesthesiology & Intensive Care, University Hospital Nancy, Nancy, France
- <sup>8</sup> Raymond Poincaré hospital, Assistance Publique – Hôpitaux de Paris, Paris, France
- <sup>9</sup> Department of Anesthesiology & Intensive Care, S Raffaele University Hospital, Milan, Italy
- <sup>10</sup> Department of Neurosurgery, Radboud University Medical Center, Nijmegen, The Netherlands
- <sup>11</sup> Department of Neurosurgery, University of Szeged, Szeged, Hungary
- <sup>12</sup> International Projects Management, ARTTIC, München, Germany
- <sup>13</sup> Department of Neurology, Neurological Intensive Care Unit, Medical University of Innsbruck, Innsbruck, Austria
- <sup>14</sup> Department of Neurosurgery & Anesthesia & intensive care medicine, Karolinska University Hospital, Stockholm, Sweden
- <sup>15</sup> NIHR Surgical Reconstruction and Microbiology Research Centre, Birmingham, UK
- <sup>16</sup> Anesthésie-Réanimation, Assistance Publique – Hôpitaux de Paris, Paris, France
- <sup>17</sup> Department of Anesthesia & ICU, AOU Città della Salute e della Scienza di Torino - Orthopedic and Trauma Center, Torino, Italy
- <sup>18</sup> Department of Neurology, Odense University Hospital, Odense, Denmark
- <sup>19</sup> BehaviourWorks Australia, Monash Sustainability Institute, Monash University, Victoria, Australia
- <sup>20</sup> Department of Public Health, Faculty of Health Sciences and Social Work, Trnava University, Trnava, Slovakia
- <sup>21</sup> Quesgen Systems Inc., Burlingame, California, USA
- <sup>22</sup> Australian & New Zealand Intensive Care Research Centre, Department of Epidemiology and Preventive Medicine, School of Public Health and Preventive Medicine, Monash University, Melbourne, Australia
- <sup>23</sup> Department of Surgery and Perioperative Science, Umeå University, Umeå, Sweden
- <sup>24</sup> Department of Neurosurgery, Medical School, University of Pécs, Hungary and Neurotrauma Research Group, János Szentágothai Research Centre, University of Pécs, Hungary
- <sup>25</sup> Department of Medical Psychology, Universitätsklinikum Hamburg-Eppendorf, Hamburg, Germany
- <sup>26</sup> Brain Physics Lab, Division of Neurosurgery, Dept of Clinical Neurosciences, University of Cambridge, Addenbrooke's Hospital, Cambridge, UK
- <sup>27</sup> Neuro ICU, Fondazione IRCCS Cà Granda Ospedale Maggiore Policlinico, Milan, Italy
- <sup>28</sup> ANZIC Research Centre, Monash University, Department of Epidemiology and Preventive Medicine, Melbourne, Victoria, Australia
- <sup>29</sup> Department of Neurosurgery, Hospital of Cruces, Bilbao, Spain
- <sup>30</sup> NeuroIntensive Care, Niguarda Hospital, Milan, Italy
- <sup>31</sup> School of Medicine and Surgery, Università Milano Bicocca, Milano, Italy

## Supplemental Material

- <sup>32</sup> NeuroIntensive Care Unit, Department Neuroscience, IRCCS Fondazione San Gerardo dei Tintori, Monza, Italy
- <sup>33</sup> Department of Neurosurgery, Medical Faculty RWTH Aachen University, Aachen, Germany
- <sup>34</sup> Department of Anesthesiology and Intensive Care Medicine, University Hospital Bonn, Bonn, Germany
- <sup>35</sup> Department of Anesthesia & Neurointensive Care, Cambridge University Hospital NHS Foundation Trust, Cambridge, UK
- <sup>36</sup> School of Public Health & PM, Monash University and The Alfred Hospital, Melbourne, Victoria, Australia
- <sup>37</sup> Radiology/MRI department, MRC Cognition and Brain Sciences Unit, Cambridge, UK
- <sup>38</sup> Institute of Medical Psychology and Medical Sociology, Universitätsmedizin Göttingen, Göttingen, Germany
- <sup>39</sup> Oxford University Hospitals NHS Trust, Oxford, UK
- <sup>40</sup> Intensive Care Unit, CHU Poitiers, Poitiers, France
- <sup>41</sup> University of Manchester NIHR Biomedical Research Centre, Critical Care Directorate, Salford Royal Hospital NHS Foundation Trust, Salford, UK
- <sup>42</sup> Movement Science Group, Faculty of Health and Life Sciences, Oxford Brookes University, Oxford, UK
- <sup>43</sup> Department of Neurosurgery, Antwerp University Hospital and University of Antwerp, Edegem, Belgium
- <sup>44</sup> Department of Anesthesia & Intensive Care, Maggiore Della Carità Hospital, Novara, Italy
- <sup>45</sup> Department of Neurosurgery, University Hospitals Leuven, Leuven, Belgium
- <sup>46</sup> Department of Neurosurgery, Clinical centre of Vojvodina, Faculty of Medicine, University of Novi Sad, Novi Sad, Serbia
- <sup>47</sup> Division of Anaesthesia, University of Cambridge, Addenbrooke's Hospital, Cambridge, UK
- <sup>48</sup> Center for Stroke Research Berlin, Charité – Universitätsmedizin Berlin, corporate member of Freie Universität Berlin, Humboldt-Universität zu Berlin, and Berlin Institute of Health, Berlin, Germany
- <sup>49</sup> Intensive Care Unit, CHR Citadelle, Liège, Belgium
- <sup>50</sup> Department of Anaesthesiology and Intensive Therapy, University of Pécs, Pécs, Hungary
- <sup>51</sup> Departments of Neurology, Clinical Neurophysiology and Neuroanesthesiology, Region Hovedstaden Rigshospitalet, Copenhagen, Denmark
- <sup>52</sup> National Institute for Stroke and Applied Neurosciences, Faculty of Health and Environmental Studies, Auckland University of Technology, Auckland, New Zealand
- <sup>53</sup> Department of Neurology, Erasmus MC, Rotterdam, the Netherlands
- <sup>54</sup> Department of Anesthesiology and Intensive care, University Hospital Northern Norway, Tromsø, Norway
- <sup>55</sup> Department of Neurosurgery, Hadassah-hebrew University Medical center, Jerusalem, Israel
- <sup>56</sup> Fundación Instituto Valenciano de Neurorehabilitación (FIVAN), Valencia, Spain
- <sup>57</sup> Department of Neurosurgery, Shanghai Renji hospital, Shanghai Jiaotong University/school of medicine, Shanghai, China
- <sup>58</sup> Karolinska Institutet, INCF International Neuroinformatics Coordinating Facility, Stockholm, Sweden
- <sup>59</sup> Emergency Department, CHU, Liège, Belgium
- <sup>60</sup> Neurosurgery clinic, Pauls Stradins Clinical University Hospital, Riga, Latvia

## Supplemental Material

- <sup>61</sup> Department of Computing, Imperial College London, London, UK
- <sup>62</sup> Department of Neurosurgery, Hospital Universitario 12 de Octubre, Madrid, Spain
- <sup>63</sup> Department of Anesthesia, Critical Care and Pain Medicine, Medical University of Vienna, Austria
- <sup>64</sup> Department of Public Health, Erasmus Medical Center-University Medical Center, Rotterdam, The Netherlands
- <sup>65</sup> College of Health and Medicine, Australian National University, Canberra, Australia
- <sup>66</sup> Department of Neurosurgery, Neurosciences Centre & JPN Apex trauma centre, All India Institute of Medical Sciences, New Delhi-110029, India
- <sup>67</sup> Department of Neurosurgery, Erasmus MC, Rotterdam, the Netherlands
- <sup>68</sup> Department of Neurosurgery, Oslo University Hospital, Oslo, Norway
- <sup>69</sup> Division of Psychology, University of Stirling, Stirling, UK
- <sup>70</sup> Division of Neurosurgery, Department of Clinical Neurosciences, Addenbrooke's Hospital & University of Cambridge, Cambridge, UK
- <sup>71</sup> Department of Neurology, University of Groningen, University Medical Center Groningen, Groningen, Netherlands
- <sup>72</sup> Neurointensive Care , Sheffield Teaching Hospitals NHS Foundation Trust, Sheffield, UK
- <sup>73</sup> Salford Royal Hospital NHS Foundation Trust Acute Research Delivery Team, Salford, UK
- <sup>74</sup> Department of Intensive Care and Department of Ethics and Philosophy of Medicine, Erasmus Medical Center, Rotterdam, The Netherlands
- <sup>75</sup> Department of Clinical Neuroscience, Neurosurgery, Umeå University, Umeå, Sweden
- <sup>76</sup> Hungarian Brain Research Program - Grant No. KTIA\_13\_NAP-A-II/8, University of Pécs, Pécs, Hungary
- <sup>77</sup> Department of Anaesthesiology, University Hospital of Aachen, Aachen, Germany
- <sup>78</sup> Cyclotron Research Center , University of Liège, Liège, Belgium
- <sup>79</sup> Centre for Urgent and Emergency Care Research (CURE), Health Services Research Section, School of Health and Related Research (SchARR), University of Sheffield, Sheffield, UK
- <sup>80</sup> Emergency Department, Salford Royal Hospital, Salford UK
- <sup>81</sup> Institute of Research in Operative Medicine (IFOM), Witten/Herdecke University, Cologne, Germany
- <sup>82</sup> VP Global Project Management CNS, ICON, Paris, France
- <sup>83</sup> Department of Anesthesiology-Intensive Care, Lille University Hospital, Lille, France
- <sup>84</sup> Department of Neurosurgery, Rambam Medical Center, Haifa, Israel
- <sup>85</sup> Department of Anesthesiology & Intensive Care, University Hospitals Southampton NHS Trust, Southampton, UK
- <sup>86</sup> Cologne-Merheim Medical Center (CMMC), Department of Traumatology, Orthopedic Surgery and Sportmedicine, Witten/Herdecke University, Cologne, Germany
- <sup>87</sup> Intensive Care Unit, Southmead Hospital, Bristol, Bristol, UK
- <sup>88</sup> Department of Neurological Surgery, University of California, San Francisco, California, USA
- <sup>89</sup> Department of Anesthesia & Intensive Care, M. Bufalini Hospital, Cesena, Italy
- <sup>90</sup> Department of Neurosurgery, University Hospital Heidelberg, Heidelberg, Germany
- <sup>91</sup> Department of Neurosurgery, The Walton centre NHS Foundation Trust, Liverpool, UK
- <sup>92</sup> Department of Medical Genetics, University of Pécs, Pécs, Hungary
- <sup>93</sup> Department of Neurosurgery, Emergency County Hospital Timisoara , Timisoara, Romania
- <sup>94</sup> School of Medical Sciences, Örebro University, Örebro, Sweden
- <sup>95</sup> Institute for Molecular Medicine Finland, University of Helsinki, Helsinki, Finland

## Supplemental Material

- <sup>96</sup> Analytic and Translational Genetics Unit, Department of Medicine; Psychiatric & Neurodevelopmental Genetics Unit, Department of Psychiatry; Department of Neurology, Massachusetts General Hospital, Boston, MA, USA
- <sup>97</sup> Program in Medical and Population Genetics; The Stanley Center for Psychiatric Research, The Broad Institute of MIT and Harvard, Cambridge, MA, USA
- <sup>98</sup> Department of Radiology, University of Antwerp, Edegem, Belgium
- <sup>99</sup> Department of Anesthesiology & Intensive Care, University Hospital of Grenoble, Grenoble, France
- <sup>100</sup> Department of Anesthesia & Intensive Care, Azienda Ospedaliera Università di Padova, Padova, Italy
- <sup>101</sup> Dept. of Neurosurgery, Leiden University Medical Center, Leiden, The Netherlands and Dept. of Neurosurgery, Medical Center Haaglanden, The Hague, The Netherlands
- <sup>102</sup> Department of Neurosurgery, Helsinki University Central Hospital
- <sup>103</sup> Division of Clinical Neurosciences, Department of Neurosurgery and Turku Brain Injury Centre, Turku University Hospital and University of Turku, Turku, Finland
- <sup>104</sup> Department of Anesthesiology and Critical Care, Pitié -Salpêtrière Teaching Hospital, Assistance Publique, Hôpitaux de Paris and University Pierre et Marie Curie, Paris, France
- <sup>105</sup> Neurotraumatology and Neurosurgery Research Unit (UNINN), Vall d'Hebron Research Institute, Barcelona, Spain
- <sup>106</sup> Department of Neurosurgery, Kaunas University of technology and Vilnius University, Vilnius, Lithuania
- <sup>107</sup> Department of Neurosurgery, Rezekne Hospital, Latvia
- <sup>108</sup> Department of Anaesthesia, Critical Care & Pain Medicine NHS Lothian & University of Edinburgh, Edinburgh, UK
- <sup>109</sup> Director, MRC Biostatistics Unit, Cambridge Institute of Public Health, Cambridge, UK
- <sup>110</sup> Department of Physical Medicine and Rehabilitation, Oslo University Hospital/University of Oslo, Oslo, Norway
- <sup>111</sup> Division of Orthopedics, Oslo University Hospital, Oslo, Norway
- <sup>112</sup> Institute of Clinical Medicine, Faculty of Medicine, University of Oslo, Oslo, Norway
- <sup>113</sup> Broad Institute, Cambridge MA Harvard Medical School, Boston MA, Massachusetts General Hospital, Boston MA, USA
- <sup>114</sup> National Trauma Research Institute, The Alfred Hospital, Monash University, Melbourne, Victoria, Australia
- <sup>115</sup> Department of Neurosurgery, Odense University Hospital, Odense, Denmark
- <sup>116</sup> International Neurotrauma Research Organisation, Vienna, Austria
- <sup>117</sup> Klinik für Neurochirurgie, Klinikum Ludwigsburg, Ludwigsburg, Germany
- <sup>118</sup> Division of Biostatistics and Epidemiology, Department of Preventive Medicine, University of Debrecen, Debrecen, Hungary
- <sup>119</sup> Department Health and Prevention, University Greifswald, Greifswald, Germany
- <sup>120</sup> Department of Anaesthesiology and Intensive Care, AUVA Trauma Hospital, Salzburg, Austria
- <sup>121</sup> Department of Neurology, Elisabeth-TweeSteden Ziekenhuis, Tilburg, the Netherlands
- <sup>122</sup> Department of Neuroanesthesia and Neurointensive Care, Odense University Hospital, Odense, Denmark
- <sup>123</sup> Department of Neuromedicine and Movement Science, Norwegian University of Science and Technology, NTNU, Trondheim, Norway

## Supplemental Material

- <sup>124</sup> Department of Physical Medicine and Rehabilitation, St.Olavs Hospital, Trondheim University Hospital, Trondheim, Norway
- <sup>125</sup> Department of Neurosurgery, University of Pécs, Pécs, Hungary
- <sup>126</sup> Division of Neuroscience Critical Care, John Hopkins University School of Medicine, Baltimore, USA
- <sup>127</sup> Department of Neuropathology, Queen Elizabeth University Hospital and University of Glasgow, Glasgow, UK
- <sup>128</sup> Dept. of Department of Biomedical Data Sciences, Leiden University Medical Center, Leiden, The Netherlands
- <sup>129</sup> Department of Pathophysiology and Transplantation, Milan University, and Neuroscience ICU, Fondazione IRCCS Cà Granda Ospedale Maggiore Policlinico, Milano, Italy
- <sup>130</sup> Department of Radiation Sciences, Biomedical Engineering, Umeå University, Umeå, Sweden
- <sup>131</sup> Perioperative Services, Intensive Care Medicine and Pain Management, Turku University Hospital and University of Turku, Turku, Finland
- <sup>132</sup> Department of Neurosurgery, Kaunas University of Health Sciences, Kaunas, Lithuania
- <sup>133</sup> Intensive Care and Department of Pediatric Surgery, Erasmus Medical Center, Sophia Children's Hospital, Rotterdam, The Netherlands
- <sup>134</sup> Department of Neurosurgery, Kings college London, London, UK
- <sup>135</sup> Neurologie, Neurochirurgie und Psychiatrie, Charité – Universitätsmedizin Berlin, Berlin, Germany
- <sup>136</sup> Department of Intensive Care Adults, Erasmus MC– University Medical Center Rotterdam, Rotterdam, the Netherlands
- <sup>137</sup> icoMetrix NV, Leuven, Belgium
- <sup>138</sup> Movement Science Group, Faculty of Health and Life Sciences, Oxford Brookes University, Oxford, UK
- <sup>139</sup> Psychology Department, Antwerp University Hospital, Edegem, Belgium
- <sup>140</sup> Director of Neurocritical Care, University of California, Los Angeles, USA
- <sup>141</sup> Department of Neurosurgery, St.Olavs Hospital, Trondheim University Hospital, Trondheim, Norway
- <sup>142</sup> Department of Emergency Medicine, University of Florida, Gainesville, Florida, USA
- <sup>143</sup> Department of Neurosurgery, Charité – Universitätsmedizin Berlin, corporate member of Freie Universität Berlin, Humboldt-Universität zu Berlin, and Berlin Institute of Health, Berlin, Germany
- <sup>144</sup> VTT Technical Research Centre, Tampere, Finland
- <sup>145</sup> Section of Neurosurgery, Department of Surgery, Rady Faculty of Health Sciences, University of Manitoba, Winnipeg, MB, Canada

|            |           |                               |
|------------|-----------|-------------------------------|
| Åkerlund   | Cecilia   | cecilia.ai.akerlund@gmail.com |
| Amrein     | Krisztina | tina.amrein84@gmail.com       |
| Andelic    | Nada      | NADAND@ous-hf.no              |
| Andreassen | Lasse     | Lasse.Andreassen@unn.no       |
| Anke       | Audny     | Audny.anke@unn.no             |
| Antoni     | Anna      | anna.antoni@meduniwien.ac.at  |
| Audibert   | Gérard    | g.audibert@chu-nancy.fr       |

## Supplemental Material

|                 |             |                                        |
|-----------------|-------------|----------------------------------------|
| Azouvi          | Philippe    | philippe.azouvi@rpc.aphp.fr            |
| Azzolini        | Maria Luisa | azzolini.marialuisa@hsr.it             |
| Bartels         | Ronald      | Ronald.Bartels@radboudumc.nl           |
| Barzó           | Pál         | pbarzo@gmail.com                       |
| Beauvais        | Romuald     | beauvais@arttic.eu                     |
| Beer            | Ronny       | ronny.beer@i-med.ac.at                 |
| Bellander       | Bo-Michael  | bo-michael.bellander@karolinska.se     |
| Belli           | Antonio     | a.belli@bham.ac.uk                     |
| Benali          | Habib       | habib.benali@gmail.com                 |
| Berardino       | Maurizio    | maurizio_berardino@fastwebnet.it       |
| Beretta         | Luigi       | beretta.luigi@hsr.it                   |
| Blaabjerg       | Morten      | morten.blaabjerg1@rsyd.dk              |
| Bragge          | Peter       | peter.bragge@monash.edu                |
| Brazinova       | Alexandra   | alexandra.brazinova@gmail.com          |
| Brinck          | Vibeke      | vibeke.brinck@quesgen.com              |
| Brooker         | Joanne      | Joanne.Brooker@monash.edu              |
| Brorsson        | Camilla     | Camilla.Brorsson@umu.se                |
| Buki            | Andras      | 2saturn@gmail.com                      |
| Bullinger       | Monika      | bullinger@uke.de                       |
| Cabeleira       | Manuel      | mc916@cam.ac.uk                        |
| Caccioppola     | Alessio     | alessio.caccioppola@gmail.com          |
| Calappi         | Emiliana    | calemy02@yahoo.it                      |
| Calvi           | Maria Rosa  | calvi.mariarosa@hsr.it                 |
| Cameron         | Peter       | peter.cameron@med.monash.edu.au        |
| Carbayo Lozano  | Guillermo   | guillermobilbo@gmail.com               |
| Carbonara       | Marco       | marco.carbonara@gmail.com              |
| Castañó-León    | Ana M.      | ana.maria.castano.leon@gmail.com       |
| Cavallo         | Simona      | cavallosimona1@gmail.com               |
| Chevallard      | Giorgio     | giorgio.chevallard@ospedaleniguarda.it |
| Chierigato      | Arturo      | arturo.chierigato@ospedaleniguarda.it  |
| Citerio         | Giuseppe    | giuseppe.citerio@unimib.it             |
| Clusmann        | Hans        | hclusmann@ukaachen.de                  |
| Coburn          | Mark Steven | mark.coburn@ukbonn.de                  |
| Coles           | Jonathan    | jpc44@wbic.cam.ac.uk                   |
| Cooper          | Jamie D.    | jamie.cooper@monash.edu                |
| Correia         | Marta       | Marta.Correia@mrc-cbu.cam.ac.uk        |
| Čović           | Amra        | amra.covic@med.uni-goettingen.de       |
| Curry           | Nicola      | nicola.curry@ouh.nhs.uk                |
| Czeiter         | Endre       | endre.czeiter@gmail.com                |
| Czosnyka        | Marek       | mc141@medschl.cam.ac.uk                |
| Dahyot-Fizelier | Claire      | c.dahyot-fizelier@chu-poitiers.fr      |
| Dark            | Paul        | paul.m.dark@manchester.ac.uk           |
| Dawes           | Helen       | hdawes@brookes.ac.uk                   |



## Supplemental Material

|             |            |                                  |
|-------------|------------|----------------------------------|
| De Keyser   | Véronique  | veronique.dekeyser@uza.be        |
| Degos       | Vincent    | vincent.degos@aphp.fr            |
| Della Corte | Francesco  | dellacorte.f@gmail.com           |
| den Boogert | Hugo       | Hugo.denBoogert@radboudumc.nl    |
| Depreitere  | Bart       | bart.depreitere@uzleuven.be      |
| Dilvesi     | Đula       | djuladjilvesi@gmail.com          |
| Dixit       | Abhishek   | ad825@cam.ac.uk                  |
| Donoghue    | Emma       | emma.donoghue@monash.edu         |
| Dreier      | Jens       | jens.dreier@charite.de           |
| Dulière     | Guy-Loup   | glduliere@gmail.com              |
| Ercole      | Ari        | ae105@cam.ac.uk                  |
| Esser       | Patrick    | pesser@brookes.ac.uk             |
| Ezer        | Erzsébet   | ezererzsebet@yahoo.com           |
| Fabricius   | Martin     | fabricius@dadlnet.dk             |
| Feigin      | Valery L.  | valery.feigin@aut.ac.nz          |
| Foks        | Kelly      | k.foks@erasmusmc.nl              |
| Frisvold    | Shirin     | Shirin.Kordasti@unn.no           |
| Furmanov    | Alex       | alexpuil@yahoo.com               |
| Gagliardo   | Pablo      | pablog@fivan.org                 |
| Galanaud    | Damien     | galanaud@gmail.com               |
| Gantner     | Dashiell   | dashiell.gantner@monash.edu      |
| Gao         | Guoyi      | gao3@sina.com                    |
| George      | Pradeep    | george@incf.org                  |
| Ghuysen     | Alexandre  | A.Ghuysen@chu.ulg.ac.be          |
| Giga        | Lelde      | lelde.giga@inbox.lv              |
| Glocker     | Ben        | b.glocker@imperial.ac.uk         |
| Golubović   | Jagoš      | jagosgolubovic@gmail.com         |
| Gomez       | Pedro A.   | pagolopez@gmail.com              |
| Gratz       | Johannes   | johannes.gratz@meduniwien.ac.at  |
| Gravesteijn | Benjamin   | b.gravesteijn@erasmusmc.nl       |
| Grossi      | Francesca  | francesca.grossi@libero.it       |
| Gruen       | Russell L. | russell.gruen@anu.edu.au         |
| Gupta       | Deepak     | drdeepakgupta@gmail.com          |
| Haagsma     | Juanita A. | j.haagsma@erasmusmc.nl           |
| Haitsma     | Iain       | i.haitsma@erasmusmc.nl           |
| Helbok      | Raimund    | Raimund.Helbok@tirol-kliniken.at |
| Helseth     | Eirik      | EHELSETH@ous-hf.no               |
| Horton      | Lindsay    | lindsay.horton@stir.ac.uk        |
| Huijben     | Jilske     | j.a.huijben@erasmusmc.nl         |
| Hutchinson  | Peter J.   | pjah2@cam.ac.uk                  |
| Jacobs      | Bram       | b.jacobs@umcg.nl                 |
| Jankowski   | Stefan     | Stefan.Jankowski@sth.nhs.uk      |
| Jarrett     | Mike       | mike.jarrett@quesgen.com         |

## Supplemental Material

|               |             |                                          |
|---------------|-------------|------------------------------------------|
| Jiang         | Ji-yao      | jiyaojiang@126.com                       |
| Johnson       | Faye        | faye.johnson@live.co.uk                  |
| Jones         | Kelly       | kejones@aut.ac.nz                        |
| Karan         | Mladen      | mladjokaran@gmail.com                    |
| Kolias        | Angelos G.  | angeloskolias@gmail.com                  |
| Kompanje      | Erwin       | erwinkompanje@me.com                     |
| Kondziella    | Daniel      | Daniel.Kondziella@regionh.dk             |
| Kornaropoulos | Evgenios    | ek481@cam.ac.uk                          |
| Koskinen      | Lars-Owe    | Lars-Owe.Koskinen@umu.se                 |
| Kovács        | Noémi       | kovacs.noemi@pte.hu                      |
| Lagares       | Alfonso     | algadoc@yahoo.com                        |
| Lanyon        | Linda       | lindal@incf.org                          |
| Laureys       | Steven      | steven.laureys@ulg.ac.be                 |
| Lecky         | Fiona       | f.e.lecky@sheffield.ac.uk                |
| Ledoux        | Didier      | dledoux@chu.ulg.ac.be                    |
| Lefering      | Rolf        | Rolf.Lefering@uni-wh.de                  |
| Legrand       | Valerie     | Valerie.Legrand@iconplc.com              |
| Lejeune       | Aurelie     | aurelie.lejeune@chru-lille.fr            |
| Levi          | Leon        | llevi@rambam.health.gov.il               |
| Lightfoot     | Roger       | Roger.Lightfoot@uhs.nhs.uk               |
| Lingsma       | Hester      | h.lingsma@erasmusmc.nl                   |
| Maas          | Andrew I.R. | andrew.maas@uza.be                       |
| Maegele       | Marc        | Marc.Maegele@t-online.de                 |
| Majdan        | Marek       | mmajdan@truni.sk                         |
| Manara        | Alex        | Alex.Manara@nbt.nhs.uk                   |
| Manley        | Geoffrey    | ManleyG@ucsf.edu                         |
| Maréchal      | Hugues      | Hugues.Marechal@chrcitadelle.be          |
| Martino       | Costanza    | costmartino74@gmail.com                  |
| Mattern       | Julia       | Julia.Mattern@med.uni-heidelberg.de      |
| McMahon       | Catherine   | Catherine.McMahon@thewaltoncentre.nhs.uk |
| Melegh        | Béla        | bela.melegh@aok.pte.hu                   |
| Menon         | David       | dkm13@cam.ac.uk                          |
| Menovsky      | Tomas       | tomas.menovsky@uza.be                    |
| Mikolic       | Ana         | a.mikolic@erasmusmc.nl                   |
| Misset        | Benoit      | Benoit.Misset@chuliege.be                |
| Muraleedharan | Visakh      | visakh@incf.org                          |
| Murray        | Lynnette    | lynnette.murray@monash.edu               |
| Nair          | Nandesh     | nandesh.nair@uza.be                      |
| Negru         | Ancuta      | negruancu@gmail.com                      |
| Nelson        | David       | david.nelson@karolinska.se               |
| Newcombe      | Virginia    | vfjn2@cam.ac.uk                          |
| Nieboer       | Daan        | d.nieboer@erasmusmc.nl                   |
| Nyirádi       | József      | nyiradi.jozsef@pte.hu                    |

# Supplemental Material

|                    |               |                                     |
|--------------------|---------------|-------------------------------------|
| Oresic             | Matej         | matej.oresic@oru.se                 |
| Ortolano           | Fabrizio      | lupeda@gmail.com                    |
| Otesile            | Olubukola     | o.otesile@sheffield.ac.uk           |
| Palotie            | Aarno         | aarno.palotie@helsinki.fi           |
| Parizel            | Paul M.       | paul.parizel@uantwerpen.be          |
| Payen              | Jean-François | Jean-Francois.Payen@ujf-grenoble.fr |
| Perera             | Natascha      | perera@arttic.eu                    |
| Perlbarg           | Vincent       | vincent.perlbarg@gmail.com          |
| Persona            | Paolo         | ppersona75@gmail.com                |
| Peul               | Wilco         | W.C.Peul@lumc.nl                    |
| Piippo-Karjalainen | Anna          | anna.piippo@hus.fi                  |
| Pirinen            | Matti         | matti.pirinen@helsinki.fi           |
| Pisica             | Dana          | d.pisica@erasmusmc.nl               |
| Ples               | Horia         | horia.ples@neuromed.ro              |
| Polinder           | Suzanne       | s.polinder@erasmusmc.nl             |
| Pomposo            | Inigo         | inigo.pomposo@osakidetza.net        |
| Posti              | Jussi P.      | jussi.posti@tyks.fi                 |
| Puybasset          | Louis         | louis.puybasset@aphp.fr             |
| Rădoi              | Andreea       | aradoi@neurotrauma.net              |
| Ragauskas          | Arminas       | telematics@ktu.lt                   |
| Raj                | Rahul         | rahul.raj@hus.fi                    |
| Rambadagalla       | Malinka       | malinka.rambadagalla@gmail.com      |
| Rehorčíková        | Veronika      | rehorcikova@gmail.com               |
| Retel Helmrich     | Isabel        | i.retelhelmrich@erasmusmc.nl        |
| Rhodes             | Jonathan      | jrhodes1@staffmail.ed.ac.uk         |
| Richardson         | Sylvia        | sylvia.richardson@mrc-bsu.cam.ac.uk |
| Richter            | Sophie        | sr773@cam.ac.uk                     |
| Ripatti            | Samuli        | samuli.ripatti@helsinki.fi          |
| Rocka              | Saulius       | saulius.rocka@mf.vu.lt              |
| Roe                | Cecilie       | e.c.t.roe@medisin.uio.no            |
| Roise              | Olav          | olav.roise@medisin.uio.no           |
| Rosand             | Jonathan      | jrosand@partners.org                |
| Rosenfeld          | Jeffrey       | J.Rosenfeld@alfred.org.au           |
| Rosenlund          | Christina     | chrisstenrose@gmail.com             |
| Rosenthal          | Guy           | rosenthalg@hadassah.org.il          |
| Rossaint           | Rolf          | RRossaint@ukaachen.de               |
| Rossi              | Sandra        | sandrarossi0@gmail.com              |
| Rueckert           | Daniel        | d.rueckert@imperial.ac.uk           |
| Rusnák             | Martin        | mrusnak@igeh.org                    |
| Sahuquillo         | Juan          | sahuquillo@neurotrauma.net          |
| Sakowitz           | Oliver        | oliver.sakowitz@gmail.com           |
| Sanchez-Porras     | Renan         | renan_md@hotmail.com                |
| Sandor             | Janos         | sandor.janos@sph.unideb.hu          |

## Supplemental Material

|               |                |                                          |
|---------------|----------------|------------------------------------------|
| Schäfer       | Nadine         | Nadine.Schaefer@uni-wh.de                |
| Schmidt       | Silke          | silke.schmidt@uni-greifswald.de          |
| Schoechl      | Herbert        | Herbert.Schoechl@auva.at                 |
| Schoonman     | Guus           | g.schoonman@tsz.nl                       |
| Schou         | Rico Frederik  | rico@mymedic.dk                          |
| Schwendenwein | Elisabeth      | elisabeth.schwendenwein@meduniwien.ac.at |
| Sewalt        | Charlie        | c.sewalt@erasmusmc.nl                    |
| Singh         | Ranjit         | R.D.Singh@lumc.nl                        |
| Skandsen      | Toril          | toril.skandsen@ntnu.no                   |
| Smielewski    | Peter          | ps10011@cam.ac.uk                        |
| Sorinola      | Abayomi        | sorinola_abayomi@hotmail.com             |
| Stamatakis    | Emmanuel       | eas46@cam.ac.uk                          |
| Stanworth     | Simon          | simon.stanworth@nhsbt.nhs.uk             |
| Kowark        | Ana            | akowark@ukaachen.de                      |
| Stevens       | Robert         | rstevens@jhmi.edu                        |
| Stewart       | William        | william.stewart@glasgow.ac.uk            |
| Steyerberg    | Ewout W.       | e.steyerberg@erasmusmc.nl                |
| Stocchetti    | Nino           | stocchet@policlinico.mi.it               |
| Sundström     | Nina           | Nina.Sundstrom@vll.se                    |
| Takala        | Riikka         | riikka.takala@tyks.fi                    |
| Tamás         | Viktória       | tamas.viktoria@pte.hu                    |
| Tamosuitis    | Tomas          | tomas.tamosuitis@kaunoklinikos.lt        |
| Taylor        | Mark Steven    | marktrnava@gmail.com                     |
| Te Ao         | Braden         | braden.teao@aut.ac.nz                    |
| Tenovuo       | Olli           | olli.tenovuo@tyks.fi                     |
| Theadom       | Alice          | alice.theadom@aut.ac.nz                  |
| Thomas        | Matt           | Matt.Thomas@nbt.nhs.uk                   |
| Tibboel       | Dick           | d.tibboel@erasmusmc.nl                   |
| Timmers       | Marjolijn      | mtimmers@hotmail.com                     |
| Tolias        | Christos       | christos.tolias@nhs.net                  |
| Trapani       | Tony           | tony.trapani@monash.edu                  |
| Tudora        | Cristina Maria | cristina.tudora@neuromed.ro              |
| Unterberg     | Andreas        | Andreas.Unterberg@med.uni-heidelberg.de  |
| Vajkoczy      | Peter          | Peter.Vajkoczy@charite.de                |
| Valeinis      | Egils          | Egils.Valeinis@latnet.lv                 |
| Vallance      | Shirley        | S.Vallance@alfred.org.au                 |
| Vámos         | Zoltán         | azozoka@gmail.com                        |
| Van der Jagt  | Mathieu        | m.vanderjagt@erasmusmc.nl                |
| van der Naalt | Joukje         | j.van.der.naalt@umcg.nl                  |
| Van der Steen | Gregory        | gregory@webstone.be                      |
| van Dijck     | Jeroen T.J.M.  | j.van.dijck@haaglandenmc.nl              |
| van Erp       | Inge           | i.a.m.van_erp@lumc.nl                    |
| van Essen     | Thomas A.      | T.A.van_Essen@lumc.nl                    |

## Supplemental Material

|                 |              |                                             |
|-----------------|--------------|---------------------------------------------|
| Van Hecke       | Wim          | wim.vanhecke@icometrix.com                  |
| van Heugten     | Caroline     | Caroline.vanheugten@maastrichtuniversity.nl |
| Van Praag       | Dominique    | dominique.vanpraag@uza.be                   |
| Van Veen        | Ernest       | e.vanveen.1@erasmusmc.nl                    |
| van Wijk        | Roel         | roel-van-wijk@ziggo.nl                      |
| Vande Vyvere    | Thijs        | thijs.vandevyvere@icometrix.com             |
| Vargiolu        | Alessia      | neurorianimazione@hsgerardo.org             |
| Vega            | Emmanuel     | emmanuel.vega@chru-lille.fr                 |
| Velt            | Kimberley    | k.velt@erasmusmc.nl                         |
| Verheyden       | Jan          | jan.verheyden@icometrix.com                 |
| Vespa           | Paul M.      | PVespa@mednet.ucla.edu                      |
| Vik             | Anne         | anne.vik@ntnu.no                            |
| Vilcinis        | Rimantas     | rimantas.vilcinis@kaunoklinikos.lt          |
| Volovici        | Victor       | v.volovici@erasmusmc.nl                     |
| von Steinbüchel | Nicole       | nvsteinbuechel@med.uni-goettingen.de        |
| Voormolen       | Daphne       | d.voormolen@erasmusmc.nl                    |
| Vulekovic       | Petar        | pvulekovic@gmail.com                        |
| Wang            | Kevin K.W.   | kawangwang17@gmail.com                      |
| Whitehouse      | Daniel       | dw555@cam.ac.uk                             |
| Wiegers         | Eveline      | e.wiegers@erasmusmc.nl                      |
| Williams        | Guy          | gbw1000@wbic.cam.ac.uk                      |
| Wilson          | Lindsay      | l.wilson@stir.ac.uk                         |
| Winzeck         | Stefan       | sw742@cam.ac.uk                             |
| Wolf            | Stefan       | stefan.wolf@charite.de                      |
| Yang            | Zhihui       | zhihuiyang@ufl.edu                          |
| Ylén            | Peter        | peter.ylen@vtt.fi                           |
| Younsi          | Alexander    | alexander.younsi@med.uni-heidelberg.de      |
| Zeiler          | Frederick A. | umzeiler@myumanitoba.ca                     |
| Ziverte         | Agate        | agate.ziverte@inbox.lv                      |
| Zoerle          | Tommaso      | tommaso.zoerle@policlinico.mi.it            |
