# Supplementary material for: Longitudinal Internal Validity of the Quality of Life after Brain Injury: Response Shift and Responsiveness
Source: MDPI journal article supplement (doi:10.3390/jcm12093197), 2023-04-29
Supplement: s1 [file s1]

## Practical Significance – Probabilities of choosing a particular response category under the corresponding model

|                          | Cognition                  |      |      |      |      |                           |      |      |      |      |
|--------------------------|----------------------------|------|------|------|------|---------------------------|------|------|------|------|
|                          | Threshold Invariance Model |      |      |      |      | Residual Invariance Model |      |      |      |      |
|                          | C0                         | C1   | C2   | C3   | C4   | C0                        | C1   | C2   | C3   | C4   |
| <i>3 months post TBI</i> |                            |      |      |      |      |                           |      |      |      |      |
| Concentration            | 0.04                       | 0.09 | 0.19 | 0.41 | 0.27 | 0.04                      | 0.09 | 0.20 | 0.42 | 0.26 |
| Expression               | 0.02                       | 0.06 | 0.15 | 0.41 | 0.36 | 0.02                      | 0.06 | 0.15 | 0.42 | 0.37 |
| Memory                   | 0.04                       | 0.11 | 0.23 | 0.36 | 0.26 | 0.04                      | 0.11 | 0.24 | 0.36 | 0.25 |
| Solutions                | 0.03                       | 0.06 | 0.15 | 0.37 | 0.40 | 0.02                      | 0.06 | 0.15 | 0.38 | 0.39 |
| Decisions                | 0.02                       | 0.06 | 0.16 | 0.40 | 0.35 | 0.02                      | 0.06 | 0.16 | 0.40 | 0.35 |
| Navigate                 | 0.02                       | 0.04 | 0.12 | 0.35 | 0.47 | 0.02                      | 0.04 | 0.12 | 0.35 | 0.47 |
| Speed                    | 0.03                       | 0.07 | 0.21 | 0.40 | 0.30 | 0.02                      | 0.07 | 0.21 | 0.40 | 0.29 |
| <i>6 months post TBI</i> |                            |      |      |      |      |                           |      |      |      |      |
| Concentration            | 0.03                       | 0.09 | 0.20 | 0.44 | 0.24 | 0.03                      | 0.09 | 0.20 | 0.43 | 0.25 |
| Expression               | 0.02                       | 0.05 | 0.15 | 0.42 | 0.36 | 0.02                      | 0.05 | 0.15 | 0.42 | 0.36 |
| Memory                   | 0.04                       | 0.11 | 0.24 | 0.36 | 0.25 | 0.04                      | 0.11 | 0.23 | 0.36 | 0.24 |
| Solutions                | 0.02                       | 0.06 | 0.15 | 0.40 | 0.39 | 0.02                      | 0.06 | 0.15 | 0.38 | 0.39 |
| Decisions                | 0.02                       | 0.06 | 0.16 | 0.40 | 0.35 | 0.02                      | 0.06 | 0.16 | 0.40 | 0.35 |
| Navigate                 | 0.02                       | 0.04 | 0.12 | 0.35 | 0.47 | 0.02                      | 0.04 | 0.12 | 0.36 | 0.47 |
| Speed                    | 0.02                       | 0.06 | 0.22 | 0.42 | 0.28 | 0.02                      | 0.07 | 0.22 | 0.41 | 0.29 |

Note. Response Categories: C0 = "Not at all"; C1 = "Slightly"; C2 = "Moderately"; C3 = "Quite"; C4 = "Very".

|                          | Self                      |      |      |      |      |                            |      |      |      |      |
|--------------------------|---------------------------|------|------|------|------|----------------------------|------|------|------|------|
|                          | Loadings Invariance Model |      |      |      |      | Threshold Invariance Model |      |      |      |      |
|                          | C0                        | C1   | C2   | C3   | C4   | C0                         | C1   | C2   | C3   | C4   |
| <i>3 months post TBI</i> |                           |      |      |      |      |                            |      |      |      |      |
| Energy                   | 0.06                      | 0.14 | 0.27 | 0.36 | 0.18 | 0.06                       | 0.14 | 0.27 | 0.36 | 0.17 |
| Motivation               | 0.04                      | 0.11 | 0.25 | 0.38 | 0.21 | 0.04                       | 0.11 | 0.26 | 0.39 | 0.21 |
| Self-Esteem              | 0.04                      | 0.10 | 0.22 | 0.39 | 0.25 | 0.04                       | 0.10 | 0.22 | 0.39 | 0.24 |
| Appearance               | 0.04                      | 0.09 | 0.23 | 0.43 | 0.21 | 0.04                       | 0.09 | 0.24 | 0.43 | 0.20 |
| Achievements             | 0.04                      | 0.07 | 0.16 | 0.36 | 0.37 | 0.04                       | 0.07 | 0.16 | 0.37 | 0.36 |
| Perception               | 0.03                      | 0.08 | 0.21 | 0.44 | 0.23 | 0.03                       | 0.08 | 0.21 | 0.45 | 0.23 |
| Future                   | 0.04                      | 0.09 | 0.22 | 0.41 | 0.24 | 0.04                       | 0.11 | 0.24 | 0.38 | 0.24 |
| <i>6 months post TBI</i> |                           |      |      |      |      |                            |      |      |      |      |
| Energy                   | 0.06                      | 0.13 | 0.26 | 0.36 | 0.19 | 0.06                       | 0.13 | 0.26 | 0.35 | 0.19 |
| Motivation               | 0.04                      | 0.11 | 0.24 | 0.38 | 0.23 | 0.04                       | 0.11 | 0.24 | 0.38 | 0.24 |
| Self-Esteem              | 0.04                      | 0.10 | 0.21 | 0.38 | 0.27 | 0.04                       | 0.10 | 0.21 | 0.38 | 0.27 |
| Appearance               | 0.04                      | 0.09 | 0.23 | 0.43 | 0.22 | 0.04                       | 0.09 | 0.22 | 0.42 | 0.23 |
| Achievements             | 0.04                      | 0.07 | 0.15 | 0.36 | 0.38 | 0.04                       | 0.07 | 0.15 | 0.35 | 0.39 |
| Perception               | 0.03                      | 0.08 | 0.20 | 0.44 | 0.25 | 0.03                       | 0.08 | 0.20 | 0.43 | 0.26 |
| Future                   | 0.04                      | 0.09 | 0.21 | 0.41 | 0.25 | 0.04                       | 0.09 | 0.21 | 0.40 | 0.26 |

Note. Response Categories: C0 = "Not at all"; C1 = "Slightly"; C2 = "Moderately"; C3 = "Quite"; C4 = "Very".

**Daily Life & Autonomy**

|                          | Threshold Invariance Model |      |      |      |      | Residual Invariance Model |      |       |      |      |
|--------------------------|----------------------------|------|------|------|------|---------------------------|------|-------|------|------|
|                          | C0                         | C1   | C2   | C3   | C4   | C0                        | C1   | C2    | C3   | C4   |
| <i>3 months post TBI</i> |                            |      |      |      |      |                           |      |       |      |      |
| Extent of Ind.           | 0.03                       | 0.07 | 0.15 | 0.38 | 0.36 | 0.03                      | 0.07 | 0.16  | 0.37 | 0.37 |
| Out and About            | 0.05                       | 0.07 | 0.13 | 0.29 | 0.46 | 0.05                      | 0.06 | 0.14  | 0.30 | 0.45 |
| Domestic Act.            | 0.05                       | 0.07 | 0.15 | 0.32 | 0.41 | 0.05                      | 0.08 | 0.16  | 0.30 | 0.42 |
| Finances                 | 0.09                       | 0.07 | 0.13 | 0.26 | 0.45 | 0.09                      | 0.07 | 0.13  | 0.26 | 0.45 |
| Work/Education           | 0.10                       | 0.12 | 0.19 | 0.32 | 0.27 | 0.10                      | 0.12 | 0.19  | 0.33 | 0.26 |
| Social Act.              | 0.09                       | 0.13 | 0.22 | 0.32 | 0.24 | 0.08                      | 0.14 | 0.22  | 0.31 | 0.25 |
| Own Life                 | 0.05                       | 0.09 | 0.18 | 0.36 | 0.33 | 0.04                      | 0.09 | 0.17  | 0.36 | 0.33 |
| <i>6 months post TBI</i> |                            |      |      |      |      |                           |      |       |      |      |
| Extent of Ind.           | 0.02                       | 0.06 | 0.13 | 0.36 | 0.42 | 0.03                      | 0.06 | 0.127 | 0.37 | 0.41 |
| Out and About            | 0.03                       | 0.05 | 0.11 | 0.28 | 0.52 | 0.03                      | 0.06 | 0.11  | 0.28 | 0.53 |
| Domestic Act.            | 0.04                       | 0.06 | 0.13 | 0.30 | 0.47 | 0.04                      | 0.06 | 0.12  | 0.32 | 0.47 |
| Finances                 | 0.07                       | 0.06 | 0.12 | 0.25 | 0.51 | 0.07                      | 0.06 | 0.11  | 0.25 | 0.50 |
| Work/Education           | 0.08                       | 0.10 | 0.19 | 0.33 | 0.31 | 0.08                      | 0.09 | 0.19  | 0.33 | 0.31 |
| Social Act.              | 0.07                       | 0.11 | 0.21 | 0.33 | 0.29 | 0.07                      | 0.10 | 0.21  | 0.34 | 0.29 |
| Own Life                 | 0.03                       | 0.07 | 0.16 | 0.37 | 0.38 | 0.03                      | 0.07 | 0.16  | 0.36 | 0.38 |

Note. Response Categories: C0 = "Not at all"; C1 = "Slightly"; C2 = "Moderately"; C3 = "Quite"; C4 = "Very".

**Social Relationships**

|                          | Loadings Invariance Model |      |      |      |      | Threshold Invariance Model |      |      |      |      |
|--------------------------|---------------------------|------|------|------|------|----------------------------|------|------|------|------|
|                          | C0                        | C1   | C2   | C3   | C4   | C0                         | C1   | C2   | C3   | C4   |
| <i>3 months post TBI</i> |                           |      |      |      |      |                            |      |      |      |      |
| Affect                   | 0.00                      | 0.02 | 0.10 | 0.42 | 0.46 | 0.00                       | 0.02 | 0.10 | 0.42 | 0.46 |
| Family                   | 0.02                      | 0.05 | 0.12 | 0.32 | 0.49 | 0.03                       | 0.05 | 0.11 | 0.33 | 0.49 |
| Friends                  | 0.02                      | 0.04 | 0.14 | 0.38 | 0.43 | 0.02                       | 0.04 | 0.14 | 0.38 | 0.43 |
| Partner                  | 0.07                      | 0.07 | 0.13 | 0.27 | 0.47 | 0.07                       | 0.07 | 0.12 | 0.28 | 0.47 |
| Sex                      | 0.14                      | 0.10 | 0.20 | 0.29 | 0.27 | 0.14                       | 0.10 | 0.21 | 0.28 | 0.27 |
| Attitudes                | 0.02                      | 0.06 | 0.17 | 0.43 | 0.33 | 0.02                       | 0.05 | 0.18 | 0.43 | 0.33 |
| <i>6 months post TBI</i> |                           |      |      |      |      |                            |      |      |      |      |
| Affect                   | 0.00                      | 0.02 | 0.10 | 0.40 | 0.47 | 0.00                       | 0.03 | 0.10 | 0.40 | 0.47 |
| Family                   | 0.03                      | 0.05 | 0.12 | 0.32 | 0.50 | 0.02                       | 0.05 | 0.12 | 0.31 | 0.50 |
| Friends                  | 0.02                      | 0.04 | 0.14 | 0.37 | 0.43 | 0.02                       | 0.05 | 0.14 | 0.36 | 0.43 |
| Partner                  | 0.07                      | 0.06 | 0.13 | 0.27 | 0.48 | 0.06                       | 0.06 | 0.14 | 0.27 | 0.47 |
| Sex                      | 0.13                      | 0.10 | 0.21 | 0.30 | 0.27 | 0.13                       | 0.09 | 0.20 | 0.31 | 0.27 |
| Attitudes                | 0.02                      | 0.05 | 0.18 | 0.43 | 0.32 | 0.02                       | 0.06 | 0.17 | 0.44 | 0.32 |

Note. Response Categories: C0 = "Not at all"; C1 = "Slightly"; C2 = "Moderately"; C3 = "Quite"; C4 = "Very".

**Emotions**

|                          | Threshold Invariance Model |      |      |      |      | Residual Invariance Model |      |      |      |      |
|--------------------------|----------------------------|------|------|------|------|---------------------------|------|------|------|------|
|                          | C0                         | C1   | C2   | C3   | C4   | C0                        | C1   | C2   | C3   | C4   |
| <i>3 months post TBI</i> |                            |      |      |      |      |                           |      |      |      |      |
| Lonely                   | 0.03                       | 0.09 | 0.13 | 0.24 | 0.50 | 0.03                      | 0.10 | 0.13 | 0.25 | 0.50 |
| Bored                    | 0.05                       | 0.12 | 0.16 | 0.28 | 0.39 | 0.05                      | 0.12 | 0.16 | 0.29 | 0.38 |
| Anxious                  | 0.05                       | 0.11 | 0.16 | 0.25 | 0.43 | 0.05                      | 0.11 | 0.16 | 0.25 | 0.43 |
| Sad                      | 0.06                       | 0.13 | 0.16 | 0.24 | 0.40 | 0.06                      | 0.13 | 0.16 | 0.25 | 0.39 |
| Angry                    | 0.05                       | 0.10 | 0.12 | 0.24 | 0.48 | 0.06                      | 0.10 | 0.12 | 0.24 | 0.47 |
| <i>6 months post TBI</i> |                            |      |      |      |      |                           |      |      |      |      |
| Lonely                   | 0.03                       | 0.09 | 0.13 | 0.25 | 0.51 | 0.03                      | 0.09 | 0.13 | 0.24 | 0.51 |
| Bored                    | 0.04                       | 0.12 | 0.16 | 0.30 | 0.39 | 0.05                      | 0.12 | 0.16 | 0.29 | 0.39 |
| Anxious                  | 0.05                       | 0.11 | 0.16 | 0.25 | 0.44 | 0.05                      | 0.11 | 0.16 | 0.25 | 0.44 |
| Sad                      | 0.06                       | 0.13 | 0.16 | 0.25 | 0.40 | 0.06                      | 0.13 | 0.16 | 0.25 | 0.41 |
| Angry                    | 0.06                       | 0.10 | 0.12 | 0.24 | 0.48 | 0.05                      | 0.10 | 0.12 | 0.24 | 0.49 |

Note. Response Categories: C0 = "Not at all"; C1 = "Slightly"; C2 = "Moderately"; C3 = "Quite"; C4 = "Very".

**Physical Problems**

|                          | Loadings Invariance Model |      |      |      |      | Threshold Invariance Model |      |      |      |      |
|--------------------------|---------------------------|------|------|------|------|----------------------------|------|------|------|------|
|                          | C0                        | C1   | C2   | C3   | C4   | C0                         | C1   | C2   | C3   | C4   |
| <i>3 months post TBI</i> |                           |      |      |      |      |                            |      |      |      |      |
| Slow                     | 0.06                      | 0.13 | 0.14 | 0.25 | 0.43 | 0.06                       | 0.13 | 0.14 | 0.25 | 0.42 |
| Injuries                 | 0.12                      | 0.14 | 0.14 | 0.20 | 0.41 | 0.12                       | 0.15 | 0.14 | 0.19 | 0.41 |
| Pain                     | 0.06                      | 0.14 | 0.16 | 0.28 | 0.36 | 0.06                       | 0.13 | 0.16 | 0.29 | 0.36 |
| See/Hear                 | 0.06                      | 0.11 | 0.13 | 0.21 | 0.50 | 0.06                       | 0.11 | 0.12 | 0.20 | 0.52 |
| Brain                    | 0.08                      | 0.13 | 0.17 | 0.27 | 0.35 | 0.08                       | 0.12 | 0.17 | 0.28 | 0.35 |
| <i>6 months post TBI</i> |                           |      |      |      |      |                            |      |      |      |      |
| Slow                     | 0.05                      | 0.11 | 0.13 | 0.24 | 0.47 | 0.04                       | 0.11 | 0.13 | 0.25 | 0.47 |
| Injuries                 | 0.10                      | 0.13 | 0.13 | 0.20 | 0.45 | 0.10                       | 0.12 | 0.12 | 0.20 | 0.46 |
| Pain                     | 0.06                      | 0.12 | 0.15 | 0.26 | 0.41 | 0.06                       | 0.12 | 0.15 | 0.26 | 0.41 |
| See/Hear                 | 0.05                      | 0.10 | 0.12 | 0.20 | 0.54 | 0.05                       | 0.10 | 0.12 | 0.21 | 0.52 |
| Brain                    | 0.06                      | 0.11 | 0.16 | 0.28 | 0.39 | 0.06                       | 0.12 | 0.16 | 0.27 | 0.40 |

Note. Response Categories: C0 = "Not at all"; C1 = "Slightly"; C2 = "Moderately"; C3 = "Quite"; C4 = "Very".

## Practical Significance – Discrepancies between invariance models

### Cognition

#### Differences Threshold vs. Residual Model

|                          | Not at all | Slightly | Moderately | Quite | Very |
|--------------------------|------------|----------|------------|-------|------|
| <i>3 months post TBI</i> |            |          |            |       |      |
| Concentration            | 0          | 0        | 0          | 0.01  | 0.01 |
| Expression               | 0          | 0        | 0          | 0     | 0    |
| Memory                   | 0          | 0        | 0          | 0     | 0.01 |
| Solutions                | 0          | 0        | 0          | 0.01  | 0.01 |
| Decisions                | 0          | 0        | 0          | 0.01  | 0.01 |
| Navigate                 | 0          | 0        | 0          | 0     | 0    |
| Speed                    | 0          | 0        | 0          | 0.01  | 0.01 |
| <i>6 months post TBI</i> |            |          |            |       |      |
| Concentration            | 0          | 0        | 0          | 0.01  | 0.01 |
| Expression               | 0          | 0        | 0          | 0     | 0    |
| Memory                   | 0          | 0        | 0          | 0     | 0.01 |
| Solutions                | 0          | 0        | 0          | 0.01  | 0.01 |
| Decisions                | 0          | 0        | 0          | 0.01  | 0.01 |
| Navigate                 | 0          | 0        | 0          | 0     | 0    |
| Speed                    | 0          | 0        | 0          | 0.01  | 0.01 |

Note. The values represent the differences between the probabilities of choosing a particular response category for the models with different constraints. Multiplying by 100 gives percentages.

### Self

#### Threshold vs. Residual Model

|                          | Not at all | Slightly | Moderately | Quite | Very |
|--------------------------|------------|----------|------------|-------|------|
| <i>3 months post TBI</i> |            |          |            |       |      |
| Energy                   | 0          | 0        | 0          | 0     | 0.01 |
| Motivation               | 0          | 0        | 0          | 0     | 0.01 |
| Self-Esteem              | 0          | 0        | 0          | 0.01  | 0.01 |
| Appearance               | 0          | 0        | 0          | 0     | 0.01 |
| Achievements             | 0          | 0        | 0          | 0.01  | 0.01 |
| Self-Perception          | 0          | 0        | 0          | 0.01  | 0.01 |
| Future                   | 0          | 0        | 0          | 0.01  | 0.01 |
| <i>6 months post TBI</i> |            |          |            |       |      |
| Energy                   | 0          | 0        | 0          | 0     | 0.01 |
| Motivation               | 0          | 0        | 0          | 0     | 0.01 |
| Self-Esteem              | 0          | 0        | 0          | 0.01  | 0.01 |
| Appearance               | 0          | 0        | 0          | 0     | 0.01 |
| Achievements             | 0          | 0        | 0          | 0.01  | 0.01 |
| Self-Perception          | 0          | 0        | 0          | 0.01  | 0.01 |
| Future                   | 0          | 0        | 0          | 0.01  | 0.01 |

Note. The values represent the differences between the probabilities of choosing a particular response category for the models with different constraints. Multiplying by 100 gives percentages.

**Daily Life & Autonomy***Threshold vs. Loading Model*

|                          | Not at all | Slightly | Moderately | Quite | Very |
|--------------------------|------------|----------|------------|-------|------|
| <i>3 months post TBI</i> |            |          |            |       |      |
| Extent of Ind.           | 0          | 0        | 0.01       | 0.01  | 0.01 |
| Out and About            | 0          | 0        | 0          | 0.01  | 0.01 |
| Domestic Act.            | 0          | 0        | 0.01       | 0.02  | 0    |
| Finances                 | 0          | 0        | 0          | 0     | 0    |
| Work/Education           | 0          | 0.01     | 0          | 0     | 0    |
| Social Act.              | 0          | 0.01     | 0.01       | 0.01  | 0    |
| Own Life                 | 0          | 0        | 0          | 0     | 0    |
| <i>6 months post TBI</i> |            |          |            |       |      |
| Extent of Ind.           | 0          | 0        | 0.01       | 0.01  | 0.01 |
| Out and About            | 0          | 0        | 0          | 0.01  | 0.01 |
| Domestic Act.            | 0          | 0.01     | 0.01       | 0.02  | 0.01 |
| Finances                 | 0.01       | 0        | 0          | 0     | 0.01 |
| Work/Education           | 0          | 0.01     | 0          | 0     | 0    |
| Social Act.              | 0          | 0.01     | 0          | 0.01  | 0    |
| Own Life                 | 0          | 0        | 0          | 0     | 0    |

Note. The values represent the differences between the probabilities of choosing a particular response category for the models with different constraints. Multiplying by 100 gives percentages.

**Social***Differences Loading vs. Threshold Model*

|                          | Not at all | Slightly | Moderately | Quite | Very |
|--------------------------|------------|----------|------------|-------|------|
| <i>3-months post TBI</i> |            |          |            |       |      |
| Affect                   | 0          | 0        | 0          | 0     | 0    |
| Family                   | 0          | 0        | 0.01       | 0.01  | 0.01 |
| Friends                  | 0          | 0        | 0          | 0.01  | 0    |
| Partner                  | 0          | 0        | 0.01       | 0     | 0    |
| Sex                      | 0          | 0        | 0          | 0.01  | 0    |
| Attitudes                | 0          | 0        | 0          | 0.01  | 0    |
| <i>6-months post TBI</i> |            |          |            |       |      |
| Affect                   | 0          | 0        | 0          | 0     | 0    |
| Family                   | 0.01       | 0        | 0.01       | 0.01  | 0    |
| Friends                  | 0          | 0.01     | 0          | 0.01  | 0    |
| Partner                  | 0.01       | 0.01     | 0.01       | 0     | 0    |
| Sex                      | 0          | 0.01     | 0          | 0.01  | 0    |
| Attitudes                | 0          | 0.01     | 0.01       | 0.01  | 0    |

Note. The values represent the differences between the probabilities of choosing a particular response category for the models with different constraints. Multiplying by 100 gives percentages.

**Emotions***Differences Threshold vs. Residual Model*

|                          | Not at all | Slightly | Moderately | Quite | Very |
|--------------------------|------------|----------|------------|-------|------|
| <i>3 months post TBI</i> |            |          |            |       |      |
| Lonely                   | 0          | 0        | 0          | 0     | 0    |
| Bored                    | 0          | 0        | 0          | 0.01  | 0    |
| Anxious                  | 0          | 0        | 0          | 0     | 0    |
| Sad                      | 0          | 0        | 0          | 0     | 0    |
| Angry                    | 0          | 0        | 0          | 0     | 0    |
| <i>6 months post TBI</i> |            |          |            |       |      |
| Lonely                   | 0          | 0        | 0          | 0     | 0    |
| Bored                    | 0          | 0        | 0          | 0.01  | 0    |
| Anxious                  | 0          | 0        | 0          | 0     | 0    |
| Sad                      | 0          | 0        | 0          | 0     | 0    |
| Angry                    | 0          | 0        | 0          | 0     | 0    |

Note. The values represent the differences between the probabilities of choosing a particular response category for the models with different constraints. Multiplying by 100 gives percentages.

**Physical Problems***Differences Loadings vs. Threshold*

|                          | Not at all | Slightly | Moderately | Quite | Very |
|--------------------------|------------|----------|------------|-------|------|
| <i>3 months post TBI</i> |            |          |            |       |      |
| Slow                     | 0          | 0        | 0          | 0     | 0    |
| Injuries                 | 0          | 0.01     | 0.01       | 0.01  | 0    |
| Pain                     | 0          | 0        | 0          | 0.01  | 0    |
| Seeing Hearing           | 0          | 0        | 0.01       | 0.01  | 0.02 |
| Brain                    | 0          | 0.01     | 0          | 0.01  | 0    |
| <i>6 months post TBI</i> |            |          |            |       |      |
| Slow                     | 0.01       | 0        | 0          | 0.01  | 0    |
| Injuries                 | 0.01       | 0.01     | 0.01       | 0.01  | 0    |
| Pain                     | 0          | 0        | 0          | 0.01  | 0    |
| Seeing Hearing           | 0          | 0        | 0.01       | 0.01  | 0.02 |
| Brain                    | 0          | 0.01     | 0          | 0.01  | 0    |

Note. The values represent the differences between the probabilities of choosing a particular response category for the models with different constraints. Multiplying by 100 gives percentages.
